# Supplementary material
Source: HighWire-hosted journal article supplement (https://bmjopen.bmj.com/content/7/12/e017974)
Supplement: inline-supplementary-material-3 [file inline-supplementary-material-3.pdf]

**Supplementary table 3: Multivariable analysis of physical activity associated factors among 12 and 13 years old students**

| WHO criteria for physical activity (at least 60 minutes per day physically active) fulfilled: |                   |                  |                  |                  |                   |                  |                   |                  |
|-----------------------------------------------------------------------------------------------|-------------------|------------------|------------------|------------------|-------------------|------------------|-------------------|------------------|
|                                                                                               | Model 1*          |                  | Model 2**        |                  | Model 3***        |                  |                   |                  |
|                                                                                               | (n=1760)          |                  | (n=1818)         |                  | Model 3a (n=1547) |                  | Model 3b (n=1523) |                  |
|                                                                                               | OR (95% CI)       | p-value          | OR (95% CI)      | p-value          | OR (95% CI)       | p-value          | OR (95% CI)       | p-value          |
| <b>Individual socioeconomic status (FAS)</b>                                                  |                   | 0.940            | -                | -                |                   | 0.763            |                   | 0.476            |
| High                                                                                          | 1                 |                  | -                | -                | 1                 |                  | 1                 |                  |
| Middle                                                                                        | 0.95 (0.69; 1.31) |                  | -                | -                | 0.89 (0.62; 1.26) |                  | 0.83 (0.58; 1.20) |                  |
| Low                                                                                           | 1.01 (0.60; 1.69) |                  | -                | -                | 0.87 (0.50; 1.54) |                  | 0.74 (0.41; 1.33) |                  |
| <b>Students' neighbourhood SES</b>                                                            | -                 | -                | -                | <b>0.028</b>     |                   | 0.079            |                   | 0.253            |
| High (rank 1-2)                                                                               | -                 | -                | 1                |                  | 1                 |                  | 1                 |                  |
| Middle (rank 3-4)                                                                             | -                 | -                | 1.24 (0.84;1.84) |                  | 1.27 (0.85; 1.88) |                  | 1.19 (0.78; 1.82) |                  |
| Low (rank 5-7)                                                                                | -                 | -                | 1.67 (1.14;2.44) |                  | 1.65 (1.07; 2.56) |                  | 1.51 (0.93; 2.46) |                  |
| <b>Sex</b>                                                                                    |                   | <b>&lt;0.001</b> |                  | <b>&lt;0.001</b> |                   | <b>&lt;0.001</b> |                   | <b>&lt;0.001</b> |
| Boys                                                                                          | 1                 |                  | 1                |                  | 1                 |                  | 1                 |                  |
| Girls                                                                                         | 0.51 (0.38; 0.69) |                  | 0.48 (0.36;0.65) |                  | 0.48 (0.35; 0.67) |                  | 0.48 (0.34; 0.68) |                  |
| <b>BMI</b>                                                                                    | 0.90 (0.85; 0.95) | <b>&lt;0.001</b> | 0.92 (0.87;0.97) | <b>0.002</b>     | 0.92 (0.87; 0.98) | <b>0.006</b>     | 0.91 (0.86; 0.97) | <b>0.003</b>     |
| <b>Migration background</b>                                                                   |                   | 0.844            |                  | 0.957            |                   | 0.588            |                   | 0.761            |
| yes                                                                                           | 1                 |                  | 1                |                  | 1                 |                  | 1                 |                  |
| no                                                                                            | 0.97 (0.69; 1.36) |                  | 0.99 (0.72;1.36) |                  | 0.91 (0.63; 1.30) |                  | 0.94 (0.65; 1.37) |                  |
| <b>Screen time</b>                                                                            |                   | 0.734            |                  | 0.165            | -                 | 0.425            |                   | 0.233            |
| ≥2 hours                                                                                      | 1                 |                  | 1                |                  | 1                 |                  | 1                 |                  |
| <2 hours                                                                                      | 1.06 (0.76; 1.49) |                  | 1.26 (0.91;1.74) |                  | 1.16 (0.81; 1.67) |                  | 1.26 (0.86; 1.86) |                  |
| <b>School type</b>                                                                            | -                 | -                | -                | -                | -                 | -                | -                 | <b>0.002</b>     |
| High School                                                                                   | -                 | -                | -                | -                | -                 | -                | 1                 |                  |
| Integrated Secondary School                                                                   | -                 | -                | -                | -                | -                 | -                | 2.15 (1.34; 3.47) |                  |
| <b>School neighbourhood SES</b>                                                               | -                 | -                | -                | -                | -                 | -                |                   | 0.723            |
| High (rank 1-2)                                                                               | -                 | -                | -                | -                | -                 | -                | 1                 |                  |
| Middle (rank 3-4)                                                                             | -                 | -                | -                | -                | -                 | -                | 1.15 (0.69; 1.92) |                  |
| Low (rank 5-7)                                                                                | -                 | -                | -                | -                | -                 | -                | 0.92 (0.52; 1.62) |                  |

\***Model 1:** individual socioeconomic status (FAS) adjusted for Sex, BMI, migration background, screen time

\*\***Model 2:** students' neighbourhood SES (3 categories) adjusted for Sex, BMI, migration background, screen time

\*\*\***Model 3 (Model 3a: Model 1+2, Model 3b: Model 1+2+ school type + school neighbourhood SES)**
